# Supplementary material
Source: PubMed Central journal article supplement (PMC4429737)
Supplement: mt2014160x1.pdf [file mt2014160x1.pdf]

Supplementary Figure S1a

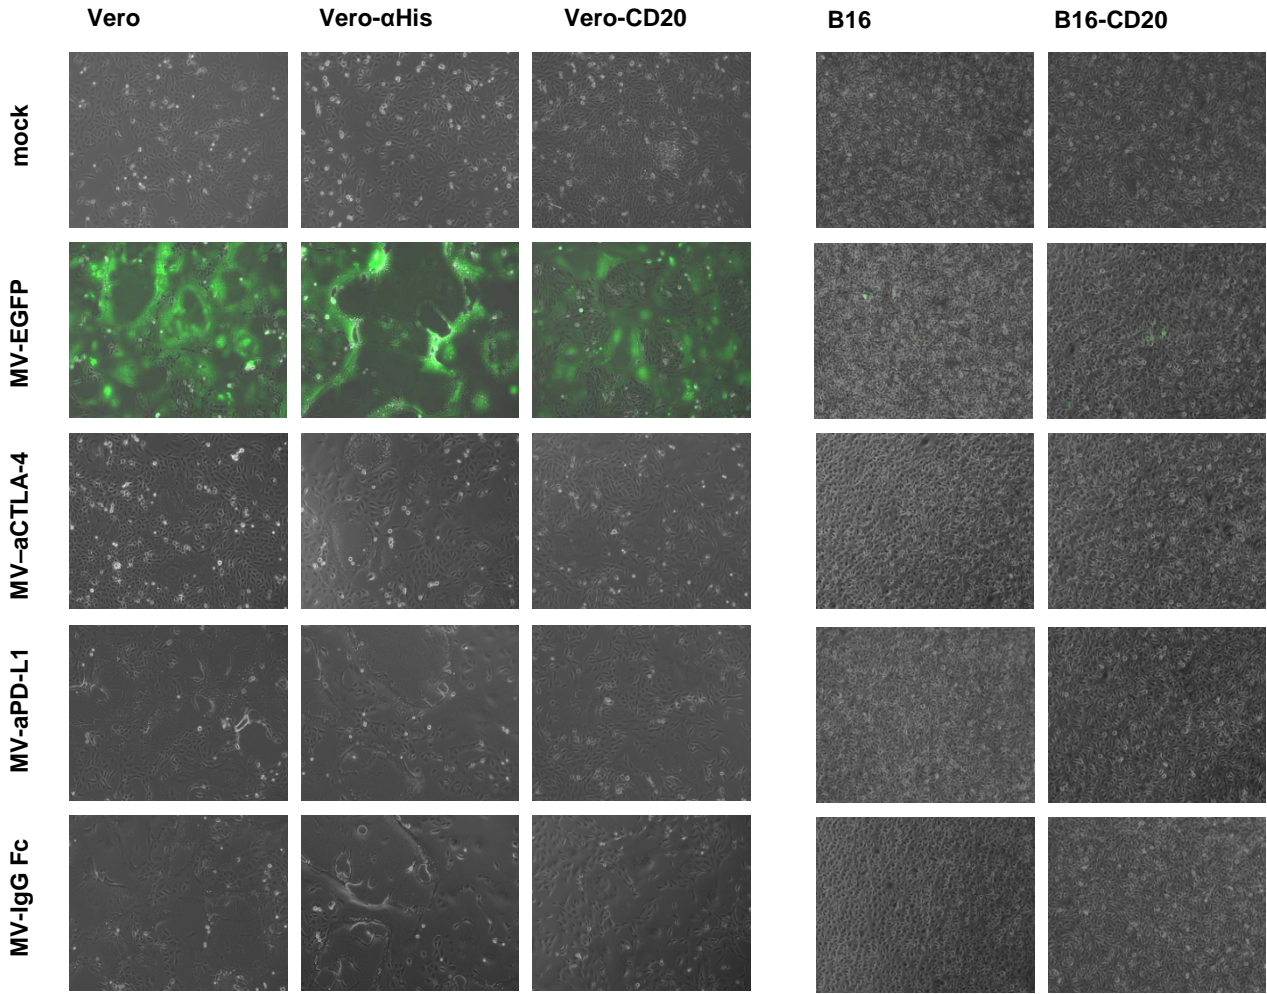

100 $\mu$ m —

Supplementary Figure S1b

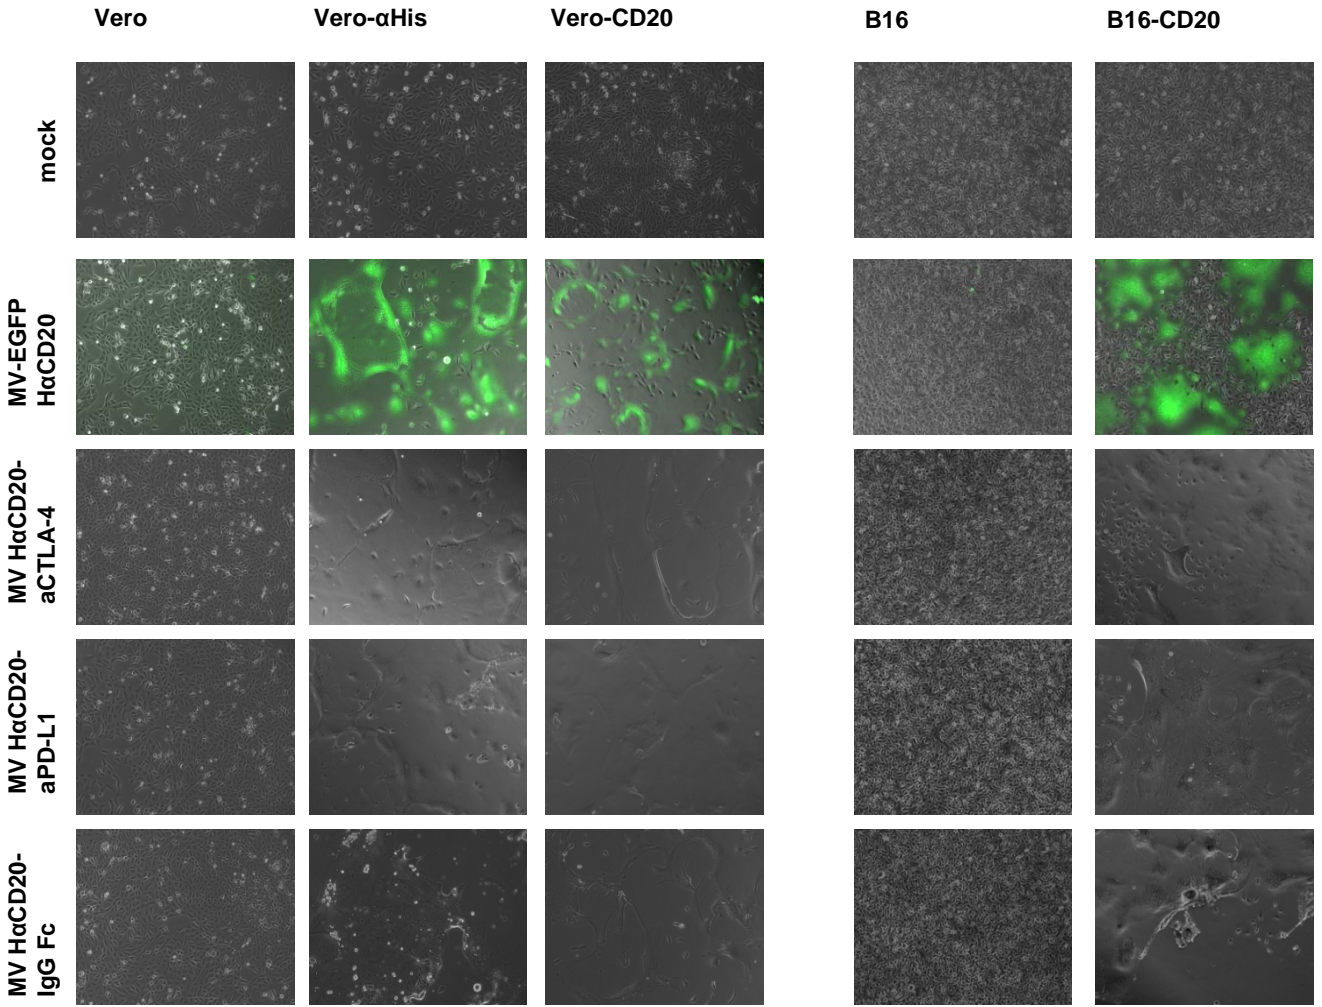

100 $\mu$ m —

**Supplementary Figure S2**

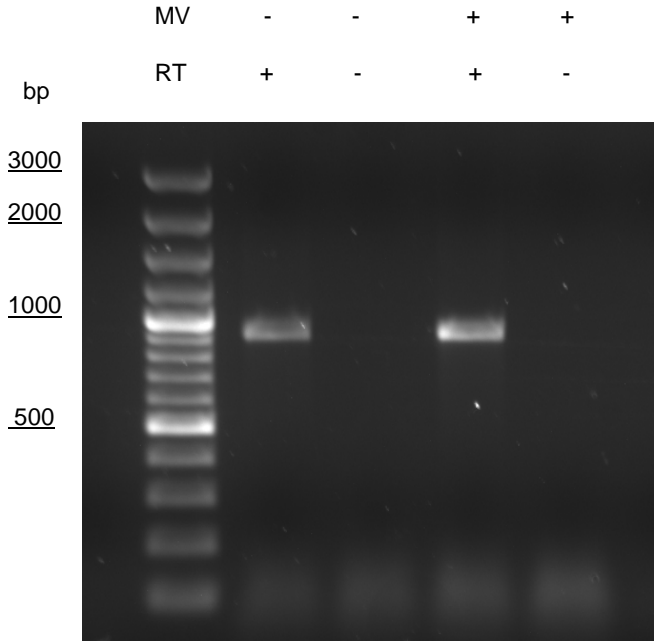

# Supplementary Figure S3

**a**

Vero

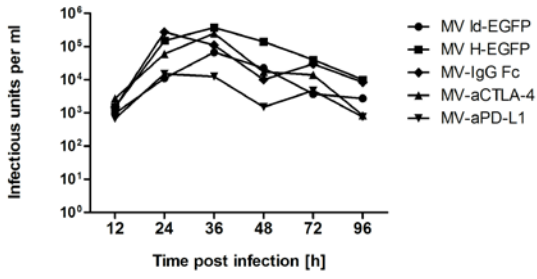

**b**

Vero- $\alpha$ His

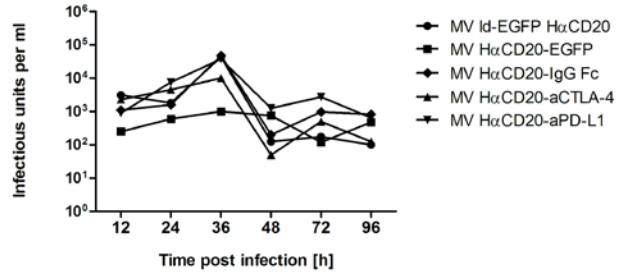

Supplementary Figure S4

96h p.i.

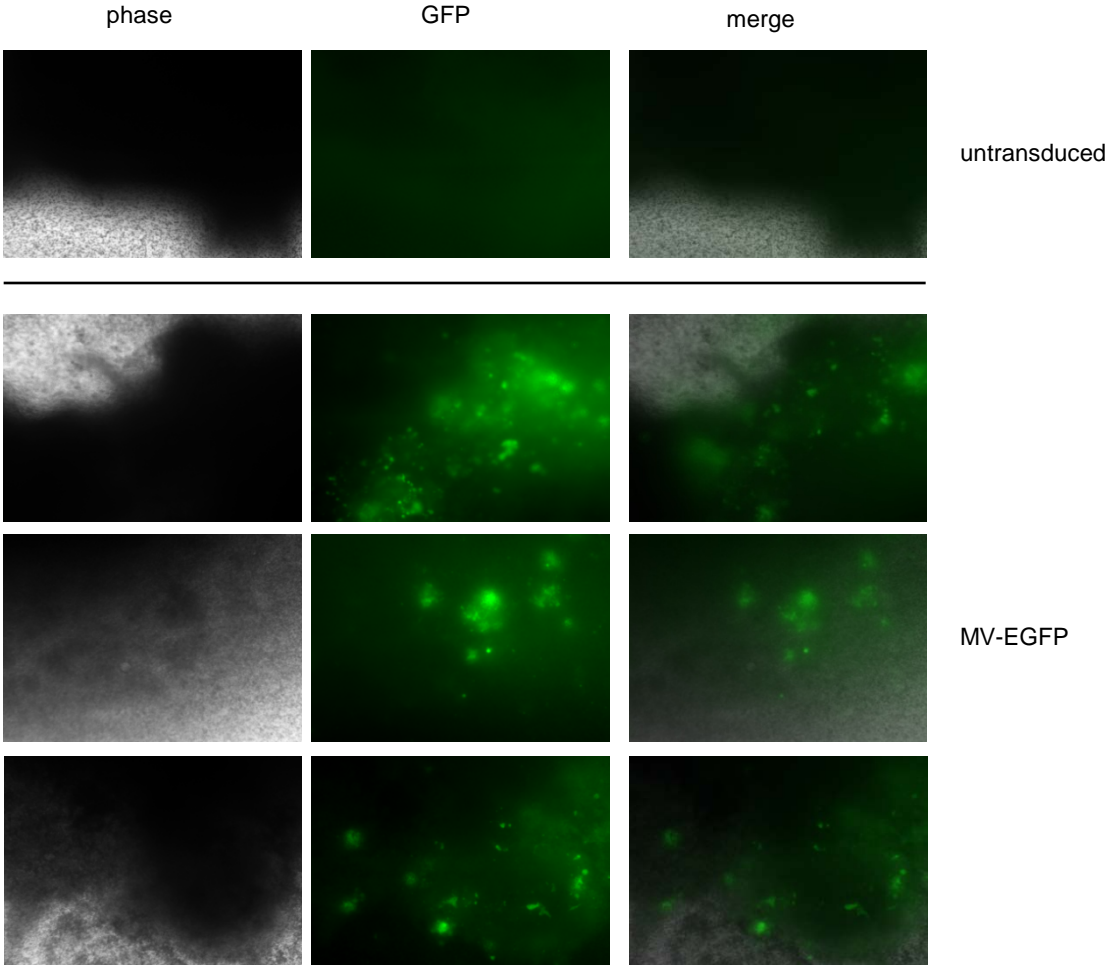

100µm —
